# Supplementary material for: R-Score: A New Parameter to Assess the Quality of Variants’ Calls Assessed by NGS Using Liquid Biopsies
Source: MDPI journal article supplement (doi:10.3390/biology10100954), 2021-09-24
Supplement: s1 [file s1]

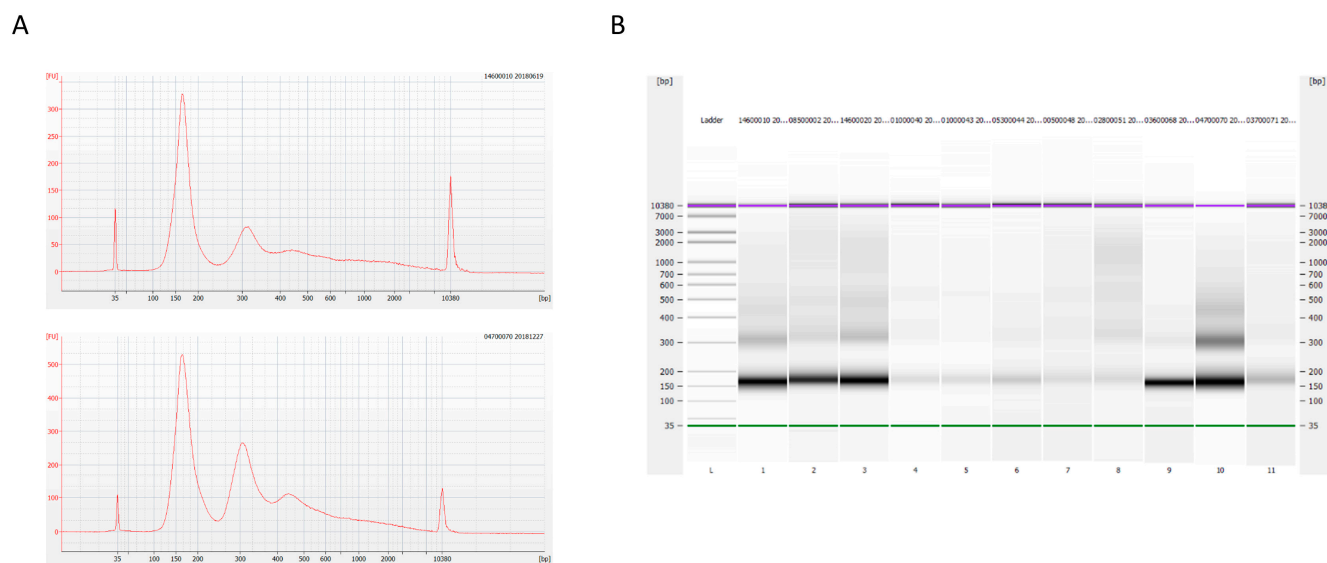

**Figure S1.** (A) Two samples electropherogram showing a 180 bp peak corresponding to low fragment cfDNA and peaks corresponding to mono-, di-, and tri-nucleosomes. (B) Gel-like image of cfDNA samples analysed with Bioanalyzer 2100.

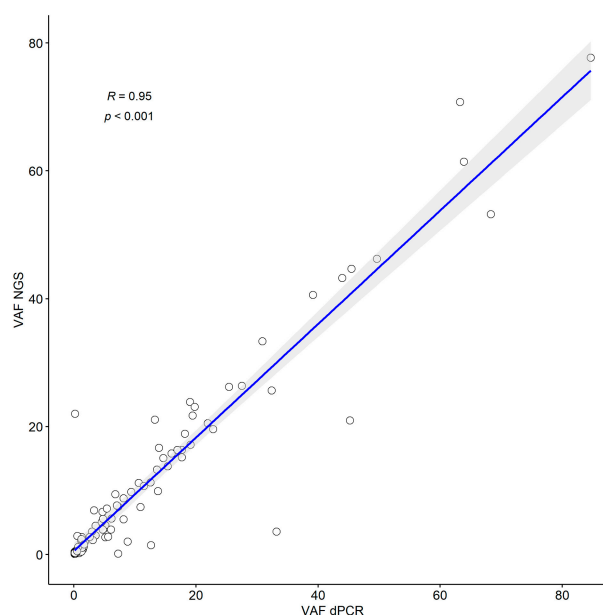

**Figure S2.** Correlation between variant allele fraction assessed by dPCR and Oncomine-NGS. Linear regression line is shown in black and the 95% confidence interval is shaded in grey. Pearson's correlation coefficient and  $p$ -value are shown in the graph.

**Table S1.** Effect size and  $p$ -values for VAF, MAPD, and R-score parameters when assessing significant differences between concordant and discordant calls.

|            | Effect Size | $P$ -value |
|------------|-------------|------------|
| VAF value  | 0.28        | 0.001      |
| MAPD value | −0.48       | < 0.001    |
| R-score    | 0.57        | < 0.001    |

Statistics for the Mann–Whitney U test

**Table S2.** Table with all *EGFR* mutations detected by dPCR, NGS-Oncomine, and NGS-GeneReader with VAF values for each assay and cfDNA concentration.

| Patient | cfDNA<br>(ng/ $\mu$ L) | EGFR initial mutation      | dPCR             | VAF_dPCR | NGS-Oncomine     | VAF_NGS-Oncomine | MAPD_NGS-<br>Oncomine | NGS-GeneReader | VAF_NGS_Gene<br>Reader | R-score |
|---------|------------------------|----------------------------|------------------|----------|------------------|------------------|-----------------------|----------------|------------------------|---------|
| 1       | 1.060                  | c.2236_2250del15           | c.2236_2250del15 | 7.007    | wt               | 0                | 4.436                 | wt             | 0                      |         |
|         |                        |                            | c.2369C>T        | 1.400    | wt               | 0                | 4.436                 | wt             | 0                      |         |
| 2       | 0.038                  | c.2573T>G                  | c.2573T>G        | 1.500    | c.2573T>G        | 0.790            | 0.281                 |                |                        | −0.449  |
| 3       | 0.102                  | c.2240_2257del18           | c.2240_2257del18 | 43.943   | c.2240_2257del18 | 43.210           | 0.208                 |                |                        | −2.318  |
|         |                        |                            | c.2369C>T        | 0.100    | wt               | 0                | 0.208                 |                |                        |         |
| 4       | 0.108                  | c.2235_2249del15           | c.2236_2250del15 | 19.096   | c.2236_2250del15 | 17.143           | 0.204                 |                |                        | −1.924  |
|         |                        |                            | c.2369C>T        | 8.798    | c.2369C>T        | 2.031            | 0.204                 |                |                        | −0.998  |
| 5       | 1.090                  | c.2235_2249del15           | c.2235_2249del15 | 0.216    | wt               | 0                | 0.167                 | wt             | 0                      |         |
| 6       | NA                     | c.2236_2250del15           | c.2236_2250del15 | 0.838    | wt               | 0                | 0.190                 |                |                        |         |
| 7       | 0.006                  | c.2235_2249del15           | c.2235_2249del15 | 3.147    | wt               | 0                | 0.287                 |                |                        |         |
| 8       | 0.127                  | c.2235_2249del15           | c.2236_2250del15 | 4.965    | c.2236_2250del15 | 4.078            | 0.174                 |                |                        | −1.370  |
|         |                        |                            | c.2369C>T        | 0.100    | wt               | 0                | 0.174                 |                |                        |         |
| 9       | 0.751                  | c.2573T>G                  | c.2573T>G        | 7.245    | c.2573T>G        | 0.113            | 0.525                 |                |                        | 0.667   |
| 10      | 0.472                  | c.2235_2249del15           | c.2235_2249del15 | 10.895   | c.2235_2249del15 | 7.430            | 0.244                 |                |                        | −1.484  |
|         |                        |                            | c.2369C>T        | 1.603    | c.2369C>T        | 1.210            | 0.244                 |                |                        | −0.695  |
| 11      | 0.284                  | c.2582T>A                  | c.2582T>A        | 1.181    | c.2582T>A        | 2.150            | 0.261                 |                |                        | −0.916  |
| 12      | 0.210                  | c.2235_2249del15           | c.2235_2249del15 | 25.429   | c.2235_2249del15 | 26.222           | 0.243                 |                |                        | −2.033  |
|         |                        |                            | c.2369C>T        | 3.554    | c.2369C>T        | 4.494            | 0.243                 |                |                        | −1.267  |
| 13      | 1.800                  | c.2235_2249del15/c.2303G>T | c.2369C>T        | 0.396    | wt               | 0                | 0.930                 | wt             | 0                      |         |
| 14      | 1.120                  | c.2235_2249del15           | c.2235_2249del15 | 1.260    | c.2235_2249del15 | 1.308            | 0.169                 |                |                        | −0.889  |
|         |                        |                            | c.2369C>T        | 0.200    | c.2369C>T        | 0.475            | 0.169                 |                |                        | −0.449  |

|    |       |                   |                   |        |                  |        |       |           |       |        |
|----|-------|-------------------|-------------------|--------|------------------|--------|-------|-----------|-------|--------|
| 15 | 0.320 | c.2235_2249del15  | c.2235_2249del15  | 9.327  | wt               | 0      | 1.897 | wt        | 0     |        |
| 16 | 1.390 | c.2240_2254del15  | c.2240_2254del15  | 12.620 | c.2240_2254del15 | 1.450  | 0.244 | wt        | 0     | −0.774 |
|    |       |                   | c.2369C>T         | 0.503  | c.2369C>T        | 0.240  | 0.244 | c.2369C>T | 0.230 | 0.007  |
| 17 | 0.328 | c.2240_2257del18  | c.2240_2257del18  | 19.015 | c.2240_2257del18 | 23.850 | 0.189 |           |       | −2.101 |
|    |       |                   | c.2369C>T         | 0.589  | wt               | 0      | 0.189 |           |       |        |
| 18 | 0.431 | c.2236_2250del15  | c.2236_2250del15  | 45.464 | c.2236_2250del15 | 44.690 | 0.367 |           |       | −2.086 |
|    |       |                   | c.2369C>T         | 18.195 | c.2369C>T        | 18.860 | 0.367 |           |       | −1.711 |
| 19 | 0.480 | c.2236_2250del15  | c.2236_2250del15  | 84.664 | c.2236_2250del15 | 77.668 | 0.334 |           |       | −2.366 |
|    |       |                   | c.2369C>T         | 17.667 | c.2369C>T        | 15.180 | 0.334 |           |       | −1.658 |
| 20 | 7.380 | c.2582T>A         | c.2582T>A         | 0.100  | c.2582T>A        | 0.105  | 0.306 |           |       | 0.464  |
| 21 | 0.799 | c.2240_2257del18  | c.2240_2257del18  | 0.681  | c.2240_2257del18 | 0.760  | 0.212 |           |       | −0.554 |
|    |       |                   | c.2369C>T         | 0.121  | c.2369C>T        | 0.400  | 0.212 |           |       | −0.276 |
| 22 | 1.320 | c.2156G>C         | c.2156G>C         | 3.546  | c.2156G>C        | 2.970  | 0.229 |           |       | −1.113 |
| 23 | 0.717 | c.2156G>C         | c.2156G>C         | 13.752 | c.2156G>C        | 9.910  | 0.328 |           |       | −1.480 |
| 24 | 0.805 | c.2236_2250del15  | c.2236_2250del15  | 15.377 | c.2236_2250del15 | 13.790 | 0.185 |           |       | −1.872 |
|    |       |                   | c.2369C>T         | 6.792  | c.2369C>T        | 9.440  | 0.185 |           |       | −1.708 |
| 25 | 0.038 | c.2573T>G         | c.2573T>G         | 1.873  | wt               | 0      | 0.408 | wt        | 0     |        |
| 26 | 0.326 | c.2310_2311insGGT | c.2310_2311insGGT | 0.293  | wt               | 0      | 0.388 | wt        | 0     |        |
| 27 | 0.170 | c.2235_2249del15  | c.2235_2249del15  | 49.641 | c.2235_2249del15 | 46.225 | 0.229 |           |       | −2.305 |
|    |       |                   | c.2369C>T         | 3.321  | c.2369C>T        | 6.915  | 0.229 |           |       | −1.480 |
| 28 | 0.580 | c.2237_2255>T     | c.2237_2255>T     | 5.152  | c.2237_2255>T    | 4.570  | 0.295 |           |       | −1.190 |
| 29 | 1.200 | c.2573T>G         | c.2573T>G         | 68.296 | c.2573T>G        | 53.190 | 0.587 |           |       | −1.957 |
| 30 | 0.990 | c.2235_2249del15  | c.2235_2249del15  | 5.173  | c.2235_2249del15 | 2.680  | 0.471 |           |       | −0.755 |
|    |       |                   | c.2369C>T         | 0.100  | wt               | 0      | 0.471 |           |       |        |
| 31 | 0.182 | c.2236_2250del15  | c.2236_2250del15  | 13.938 | c.2236_2250del15 | 16.670 | 0.354 |           |       | −1.673 |
| 32 | 0.610 | c.2239_2256del18  | c.2239_2256del18  | 0.579  | c.2236_2250del15 | 0.820  | 0.422 |           |       | −0.288 |
| 33 | 1.030 | c.2573T>G         | c.2573T>G         | 13.615 | c.2573T>G        | 13.250 | 0.375 |           |       | −1.548 |

|    |       |                             |                                     |                           |                                                         |                           |                         |                                                         |                  |                            |
|----|-------|-----------------------------|-------------------------------------|---------------------------|---------------------------------------------------------|---------------------------|-------------------------|---------------------------------------------------------|------------------|----------------------------|
| 34 | 4.980 | c.2235_2249del15            | c.2235_2249del15<br>c.2369C>T       | 63.279<br>0.100           | c.2235_2249del15<br>wt                                  | 70.730<br>0               | 1.797<br>1.797          |                                                         |                  | −1.595                     |
| 35 | 3.450 | c.2239_2248TTAAGAG<br>AAG>C | c.2239_2248TTAAGAG<br>AAG>C         | 0.883                     | c.2239_2248TTAAGAG<br>AAG>C                             | 0.210                     | 0.168                   | wt                                                      | 0                | −0.097                     |
| 36 | 0.100 | c.2235_2249del15            | c.2235_2249del15                    | 7.287                     | c.2235_2249del15                                        | 7.460                     | 0.456                   |                                                         |                  | −1.214                     |
| 37 | 0.952 | c.2573T>G                   | c.2573T>G                           | 32.414                    | c.2573T>G                                               | 25.630                    | 0.429                   |                                                         |                  | −1.776                     |
| 38 | 0.742 | c.2240_2257del18            | c.2240_2257del18<br>c.2369C>T       | 0.681<br>0.121            | c.2240_2257del18<br>c.2369C>T                           | 0.485<br>0.295            | 0.283<br>0.283          |                                                         |                  | −0.234<br>−0.017           |
| 39 | 0.473 | c.2235_2249del15            | c.2235_2249del15<br>c.2369C>T       | 5.626<br>0.509            | c.2235_2249del15<br>wt                                  | 2.778<br>0                | 0.308<br>0.308          |                                                         |                  | −0.955                     |
| 40 | 0.981 | c.2573T>G                   | c.2573T>G<br>c.2369C>T              | 8.140<br>3.102            | c.2573T>G<br>c.2369C>T                                  | 5.479<br>2.270            | 0.265<br>0.265          |                                                         |                  | −1.315<br>−0.933           |
| 41 | 1.840 | c.2573T>G/c.2303G>T         | c.2573T>G<br>c.2303G>T<br>c.2369C>T | 17.674<br>13.270<br>4.578 | c.2573T>G<br>c.2303G>T<br>c.2369C>T                     | 16.337<br>21.070<br>5.050 | 0.278<br>0.278<br>0.278 |                                                         |                  | −1.769<br>−1.880<br>−1.259 |
| 42 | 0.688 | c.2235_2249del15            | c.2236_2250del15                    | 0.365                     | c.2236_2250del15                                        | 0.321                     | 0.221                   |                                                         |                  | −0.161                     |
| 43 | 0.232 | c.2235_2249del15            | c.2235_2249del15                    | 1.703                     | wt                                                      | 0                         | 0.284                   |                                                         |                  |                            |
| 44 | 1.110 | c.2573T>G                   | c.2573T>G<br>c.2369C>T              | 0.510<br>0.519            | wt<br>wt                                                | 0<br>0                    | 1.405<br>1.405          | wt<br>wt                                                | 0<br>0           |                            |
| 45 | 0.639 | c.2236_2250del15            | c.2236_2250del15<br>c.2369C>T       | 45.218<br>27.516          | c.2236_2250del15<br>c.2369C>T                           | 20.950<br>26.380          | 0.420<br>0.420          | c.2236_2250del15<br>c.2369C>T                           | 20.300<br>27.000 | −1.698<br>−1.798           |
| 46 | 0.518 | c.2239_2256del18            | c.2239_2256del18                    | 19.800                    | c.2236_2252delGAATT<br>AAGAGAAGCAACinsAT<br>(COSM26680) | 23.080                    | 0.098                   | c.2236_2252delGAATT<br>AAGAGAAGCAACinsAT<br>(COSM26680) | 14.430           | −2.372                     |
|    |       |                             | c.2369C>T                           | 15.993                    | c.2369C>T                                               | 15.810                    | 0.098                   | c.2369C>T                                               | 12.900           | −2.208                     |
| 47 | 0.280 | c.2573T>G                   | c.2573T>G<br>c.2369C>T              | 63.908<br>22.795          | c.2573T>G<br>c.2369C>T                                  | 61.400<br>19.610          | 0.145<br>0.145          | c.2573T>G<br>c.2369C>T                                  | 57.400<br>18.500 | −2.627<br>−2.131           |

|    |       |                     |                  |        |                                     |        |       |                                     |        |        |
|----|-------|---------------------|------------------|--------|-------------------------------------|--------|-------|-------------------------------------|--------|--------|
| 48 | 0.735 | c.2239_2256del18    | c.2239_2256del18 | 0.688  | wt                                  | 0      | 0.279 |                                     |        |        |
|    |       |                     | c.2369C>T        | 0.326  | wt                                  | 0      | 0.279 |                                     |        |        |
| 49 | 7.950 | c.2573T>G           | c.2573T>G        | 19.459 | c.2573T>G                           | 21.700 | 0.171 | c.2573T>G                           | 18.000 | −2.103 |
| 50 | 0.244 | c.2573T>G           | c.2573T>G        | 4.337  | wt                                  | 0      | 0.424 |                                     |        |        |
| 51 | 2.380 | c.2573T>G           | c.2573T>G        | 9.410  | c.2573T>G                           | 9.800  | 0.096 | c.2573T>G                           | 8.560  | −2.009 |
|    |       |                     | c.2369C>T        | 1.277  | c.2369C>T                           | 1.350  | 0.096 | c.2369C>T                           | 0.910  | −1.148 |
| 52 | 0.080 | c.2236_2250del15    | c.2236_2250del15 | 1.300  | c.2236_2250del15                    | 2.730  | 0.127 | c.2236_2250del15                    | 0.400  | −1.332 |
|    |       |                     | c.2369C>T        | 0.360  | wt                                  | 0      | 0.127 | c.2369C>T                           | 1.600  |        |
| 53 | 0.340 | c.2573T>G           | c.2573T>G        | 0.211  | c.2573T>G                           | 0.400  | 0.108 | c.2573T>G                           | 0.420  | −0.569 |
|    |       |                     | c.2369C>T        | 0.174  | wt                                  | 0      | 0.108 | wt                                  | 0      |        |
| 54 | 0.210 | c.2573T>G           | c.2573T>G        | 10.607 | c.2573T>G                           | 11.200 | 0.116 | c.2573T>G                           | 9.790  | −1.985 |
|    |       |                     | c.2369C>T        | 4.777  | c.2369C>T                           | 5.580  | 0.116 | c.2369C>T                           | 2.630  | −1.682 |
| 55 | 0.190 | c.2236_2250del15    | c.2236_2250del15 | 33.190 | c.2236_2250del15                    | 3.570  | 0.740 | c.2236_2250del15                    | 26.860 | −0.683 |
|    |       |                     | c.2369C>T        | 13.602 | wt                                  | 0      | 0.740 | c.2369C>T                           | 11.200 |        |
| 56 | 2.240 | c.2239_2253del15    | c.2239_2253del15 | 4.709  | c.2239_2253del15TTA<br>AGAGAAGCAACA | 6.660  | 0.729 | c.2239_2253del15TTA<br>AGAGAAGCAACA | 3.780  | −0.961 |
|    |       |                     | c.2369C>T        | 6.061  | c.2369C>T                           | 3.880  | 0.729 | c.2369C>T                           | 4.660  | −0.726 |
| 57 | 0.891 | c.2235_2249del15    | c.2369C>T        | 0.302  | wt                                  | 0      | 0.639 | wt                                  | 0      |        |
| 58 | 0.475 | c.2582T>A/c.2573T>G | c.2582T>A        | 1.078  | c.2582T>A                           | 1.020  | 0.330 | c.2582T>A                           | 1.230  | −0.490 |
|    |       |                     | c.2573T>G        | 0.410  | wt                                  | 0      | 0.330 | c.2573T>G                           | 0.540  |        |
|    |       |                     | c.2369C>T        | 0.175  | wt                                  | 0      | 0.330 | wt                                  | 0      |        |
| 59 | 1.040 | c.2236_2253del18    | c.2236_2253del18 | 0.192  | L747S                               | 21.980 | 0.358 | L747S                               | 28.000 | −1.788 |
|    |       |                     | c.2369C>T        | 12.537 | c.2369C>T                           | 11.260 | 0.358 | c.2369C>T                           | 11.000 | −1.498 |
| 60 | 2.400 | c.2573T>G           | c.2573T>G        | 18.707 | wt                                  | 0      | 0.355 |                                     |        |        |
|    |       |                     | c.2369C>T        | 0.166  | wt                                  | 0      | 0.355 |                                     |        |        |
| 61 | 0.360 | c.2573T>G           | c.2573T>G        | 2.962  | c.2573T>G                           | 3.570  | 0.471 | c.2573T>G                           | 5.340  | −0.880 |
| 62 | 1.760 | c.2573T>G           | c.2573T>G        | 0.198  | c.2573T>G                           | 0.300  | 0.230 | wt                                  | 0      | −0.115 |

|    |       |                  |                  |        |                  |        |       |                  |        |        |
|----|-------|------------------|------------------|--------|------------------|--------|-------|------------------|--------|--------|
|    |       |                  | c.2369C>T        | 0.430  | wt               | 0      | 0.230 | wt               | 0      |        |
| 63 | 1.930 | c.2236_2250del15 | c.2236_2250del15 | 11.453 | c.2236_2250del15 | 10.700 | 0.244 | c.2236_2250del15 | 6.050  | −1.642 |
|    |       |                  | c.2369C>T        | 5.409  | c.2369C>T        | 7.170  | 0.244 | c.2369C>T        | 3.700  | −1.468 |
| 64 | 1.050 | c.2573T>G        | c.2573T>G        | 8.119  | c.2573T>G        | 8.800  | 0.234 | c.2573T>G        | 7.100  | −1.575 |
|    |       |                  | c.2369C>T        | 4.583  | wt               | 0      | 0.234 | c.2573T>G        | 3.400  |        |
| 65 | 1.110 | c.2573T>G        | c.2573T>G        | 0.570  | wt               | 0      | 0.527 | wt               | 0      |        |
|    |       |                  | c.2369C>T        | 0.614  | c.2369C>T        | 0.480  | 0.527 | wt               | 0      | 0.041  |
| 66 | 1.330 | c.2573T>G        | c.2573T>G        | 0.553  | wt               | 0      | 0.770 |                  |        |        |
| 67 | 1.480 | c.2240_2257del18 | c.2240_2257del18 | 30.900 | c.2240_2257del18 | 33.330 | 0.647 | c.2240_2257del18 | 27.400 | −1.712 |
|    |       |                  | c.2369C>T        | 1.605  | wt               | 0      | 0.647 | c.2369C>T        | 1.830  |        |
| 68 | 1.350 | c.2573T>G        | c.2573T>G        | 0.149  | wt               | 0      | 0.455 | wt               | 0      |        |
| 69 | 1.170 | c.2238_2248>GC   | c.2238_2248>GC   | 1.800  | c.2238_2248>GC   | 1.980  | 0.517 | wt               | 0      | −0.583 |
| 70 | 3.000 | c.2235_2249del15 | c.2235_2249del15 | 14.660 | c.2235_2249del15 | 15.050 | 0.426 |                  |        | −1.548 |
| 71 | 0.429 | c.2573T>G        | c.2573T>G        | 1.066  | c.2573T>G        | 0.450  | 0.289 | c.2573T>G        | 1.350  | −0.192 |
|    |       |                  | c.2369C>T        | 1.231  | c.2369C>T        | 0.430  | 0.289 | c.2369C>T        | 1.000  | −0.173 |
| 72 | 1.620 | c.2236_2250del15 | c.2236_2250del15 | 39.170 | c.2236_2250del15 | 40.600 | 0.308 | c.2236_2250del15 | 36.920 | −2.120 |
| 73 | 0.638 | c.2573T>G        | c.2573T>G        | 0.175  | c.2573T>G        | 0.100  | 0.246 | wt               | 0      | 0.391  |
|    |       |                  | c.2369C>T        | 0.185  | wt               | 0      | 0.246 | wt               | 0      |        |
| 74 | 0.442 | c.2573T>G        | c.2573T>G        | 0.586  | c.2543C>T        | 2.900  | 2.032 |                  |        | −0.154 |
|    |       |                  | c.2369C>T        | 0.547  | wt               | 0      | 2.032 |                  |        |        |
| 75 | 0.650 | c.2235_2249del15 | c.2235_2249del15 | 1.420  | c.2235_2249del15 | 1.890  | 0.498 | c.2235_2249del15 | 1.680  | −0.579 |
|    |       |                  | c.2369C>T        | 0.320  | wt               | 0      | 0.498 | wt               | 0      |        |
| 76 | 0.215 | c.2573T>G        | c.2573T>G        | 0.712  | wt               | 0      | 0.205 |                  |        |        |
| 77 | 0.100 | c.2235_2249del15 | c.2235_2249del15 | 4.720  | c.2235_2249del15 | 3.900  | 0.459 | c.2235_2249del15 | 2.440  | −0.929 |
| 78 | 0.531 | c.2573T>G        | c.2573T>G        | 0.135  | c.2573T>G        | 0.150  | 0.167 | wt               | 0      | 0.047  |
|    |       |                  | c.2369C>T        | 0.203  | wt               | 0      | 0.167 | wt               | 0      |        |
| 79 | 0.226 | c.2235_2249del15 | c.2235_2249del15 | 0.838  | wt               | 0      | 0.282 |                  |        |        |

|    |        |                  |                  |        |                  |        |       |                  |        |        |
|----|--------|------------------|------------------|--------|------------------|--------|-------|------------------|--------|--------|
|    |        |                  | c.2369C>T        | 0.427  | wt               | 0      | 0.210 |                  |        |        |
| 80 | 1.400  | c.2573T>G        | c.2573T>G        | 0.157  | c.2573T>G        | 0.240  | 0.197 |                  |        | −0.086 |
| 81 | 0.875  | c.2573T>G        | c.2573T>G        | 16.971 | c.2573T>G        | 16.360 | 0.387 | c.2573T>G        | 14.200 | −1.626 |
|    |        |                  | c.2369C>T        | 7.038  | c.2369C>T        | 7.660  | 0.387 | c.2369C>T        | 3.750  | −1.297 |
| 82 | 12.200 | c.2573T>G        | c.2573T>G        | 21.911 | c.2573T>G        | 20.530 | 0.339 | c.2573T>G        | 21.910 | −1.782 |
|    |        |                  | c.2369C>T        | 2.591  | c.2369C>T        | 2.720  | 0.339 | c.2369C>T        | 2.620  | −0.904 |
| 83 | 1.040  | c.2235_2249del15 | c.2235_2249del15 | 1.239  | c.2235_2249del15 | 2.400  | 0.191 | c.2235_2249del15 | 1.450  | −1.099 |
|    |        |                  | c.2369C>T        | 1.380  | c.2369C>T        | 1.035  | 0.191 | c.2369C>T        | 0.650  | −0.734 |
| 84 | 1.250  | c.2237_2255>T    | c.2237_2255>T    | 0.711  | c.2237_2255>T    | 1.158  | 0.160 | wt               | 0      | −0.860 |
|    |        |                  | c.2369C>T        | 0.532  | c.2369C>T        | 0.540  | 0.160 | wt               | 0      | −0.528 |
| 85 | 4.690  | c.2235_2249del15 | c.2235_2249del15 | 6.175  | c.2235_2249del15 | 5.630  | 0.254 |                  |        | −1.346 |
|    |        |                  | c.2369C>T        | 1.662  | c.2369C>T        | 1.57   | 0.254 |                  |        | −0.790 |
